# Supplementary material for: Haematological and biochemical assay in sub chronic toxicity and ameliorative effects of Ziziphus nummularia leaves extract on wister rat
Source: Research Square preprint supplement (doi:10.21203/rs.3.rs-7705356/v1), 2025-10-21
Supplement: Supplementary file 1 [file 4237daffc4ce9b99d98f5ca9.docx]

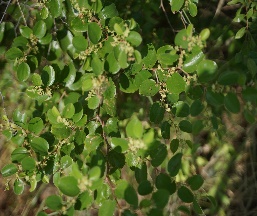

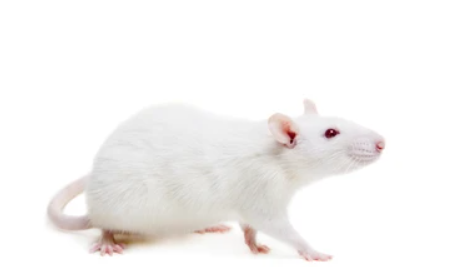

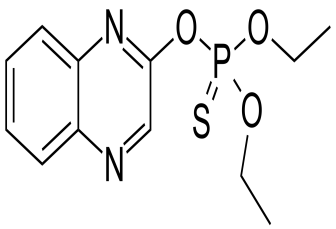
Induced recovery

500,300 and 250mg/kg

Ziziphu nummularia

Quinolphos


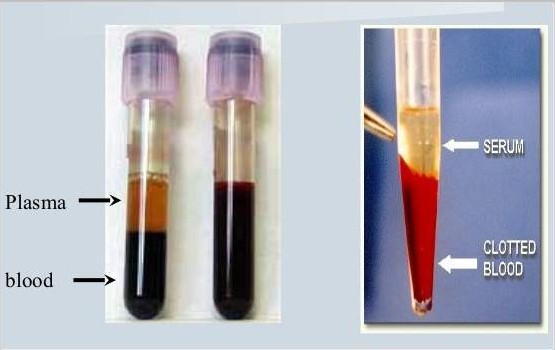


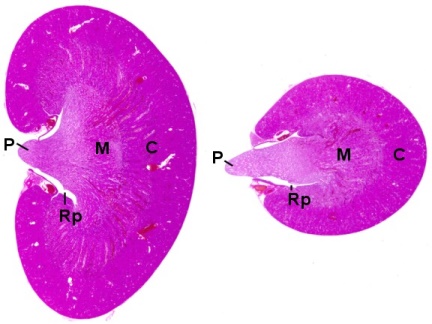

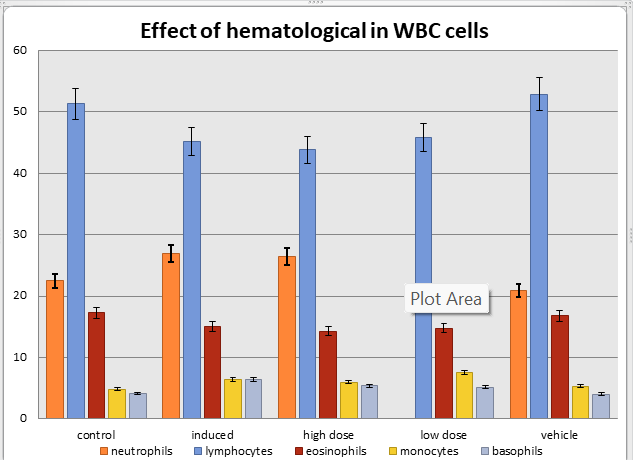

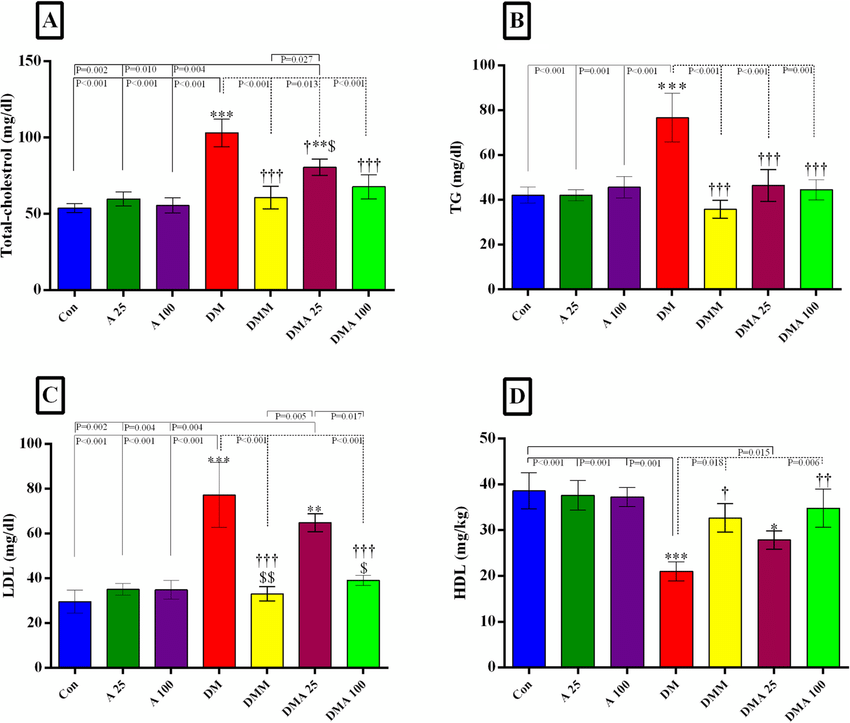

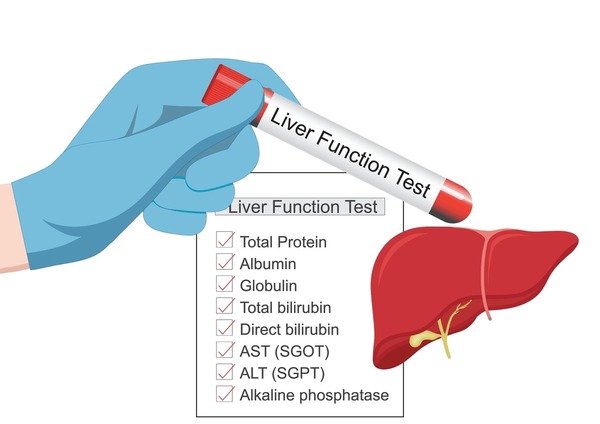
 In-mm

**Recovery of toxicity, pharmacologic activity and Immune Modulatary effect**
