# Supplementary material for: Haematological and biochemical assay in sub chronic toxicity and ameliorative effects of Ziziphus nummularia leaves extract on wister rat
Source: Research Square preprint supplement (doi:10.21203/rs.3.rs-7705356/v1), 2025-10-21
Supplement: Supplementary file 2 [file e918360942475dc9a6d6e4c2.docx]

**High lights**

- To evaluate the quinolphos induced in wister rat and to recover the ziziphus nummularia extract
- To induce Quinohos and z. nummularia extract at different dose level
- Analysis of liver and kidney functions showed a significant increase compared to the control group.
- Investigation of the immune-modulatory potential of Ziziphus nummularia in mitigating quinolphos-induced hematotoxicity.
